# Supplementary material for: Low-cost batteries based on industrial waste Al–Si microparticles and LiFePO4 for stationary energy storage
Source: Royal Society of Chemistry journal article supplement (doi:10.1039/d1dt01165k), 2021-01-01
Supplement: d1dt01165k1.pdf [file d1dt01165k1.pdf]

## Electronic Supplementary Information

### Low-cost batteries based on industrial waste Al-Si microparticles and LiFePO<sub>4</sub> for stationary energy storage

Nan Zhang,<sup>a</sup> Chuangchao Sun,<sup>a</sup> Yiqiang Huang,<sup>a</sup> Ling Lv,<sup>a</sup> Zunchun Wu,<sup>a</sup> Chunnan  
Zhu,<sup>a</sup> Xuancheng Wang,<sup>a</sup> Xuezhong Xiao,<sup>a</sup> Xiulin Fan,<sup>\*a</sup> and Lixin Chen<sup>\*a</sup>

<sup>a</sup> State Key Laboratory of Silicon Materials, School of Materials Science and  
Engineering, Zhejiang University, Hangzhou 310027, China.

\* Corresponding author email: xlfan@zju.edu.cn; lxchen@zju.edu.cn

## Supplementary Note

### 1. Discussion of chemical stability of LiPF<sub>6</sub> ether electrolytes

Although ether-based electrolytes showed promising prospects for alloy anodes, not all ethers are adaptable with the most common salt, LiPF<sub>6</sub>. Only several ethers with a specific structure exhibit good compatibility with LiPF<sub>6</sub>. We studied the physical state changes of various commonly used ethers solvents containing 1.0 M LiPF<sub>6</sub> along with time, including THF, 2-MeTHF, THF/2-MeTHF (THF: 2-MeTHF = 1:1, vol.), dimethoxyethane (DME), 1,3-dioxolane (DOL). At the very beginning of adding 1.0 M LiPF<sub>6</sub> to the mentioned five ether solvents and baseline EC/DMC solvent, colorless (or slightly yellow) and transparent solutions were acquired for all the above solvents. After only 5 minutes, a violent reaction accompanied by heat generation was observed in DOL solvent, and the overall solution transformed to gelatinous soon. The reaction of LiPF<sub>6</sub> with LiPF<sub>6</sub> and DME occurred soon after and lasted for several days. Eventually, the whole solution of THF electrolyte and ~1/3 of DME electrolyte converted to gelatinous. There are no noticeable state changes in 2-MeTHF, THF/2-MeTHF, and EC/DMC solutions after one month.

### 2. Discussion of chemical stability of LiPF<sub>6</sub> ether electrolytes

We compared the solvation structure information from the Raman band shift of the PF<sub>6</sub><sup>-</sup> anion in various electrolytes. As Fig. S15 shows, an increased Raman peak blueshift of the ~741 cm<sup>-1</sup> band<sup>1</sup> assigned to PF<sub>6</sub><sup>-</sup> was observed in the sequence of 1.0 M LiPF<sub>6</sub> EC/DMC < 1.0 M LiPF<sub>6</sub> 2-MeTHF < 2.0 M LiPF<sub>6</sub> 2-MeTHF, which suggests the rising ionic association between PF<sub>6</sub><sup>-</sup> and Li<sup>+</sup>. The strong PF<sub>6</sub><sup>-</sup>···Li<sup>+</sup> binding energy in 2-MeTHF-based electrolytes leads to the formation of contact ion pairs (CIPs) and aggregates (AGGs).<sup>2, 3</sup> In addition, the blueshift of CH<sub>2</sub> stretch Raman shift showed a decrease in the following order: 1.0 M LiPF<sub>6</sub> EC/DMC > 2.0 M LiPF<sub>6</sub> 2-MeTHF > 1.0

M LiPF<sub>6</sub> 2-MeTHF, which means the reduced solvation ability in 2-MeTHF-based electrolytes. The combination of these two factors renders an elevated LiPF<sub>6</sub> reduction potential much prior to the ether solvent,<sup>4</sup> facilitating the formation of LiF and suppressing the decomposition of the solvent. We finally chose to use 2.0 M LiPF<sub>6</sub> 2-MeTHF for the subsequent tests based on the above analysis.

### Supplementary Figure

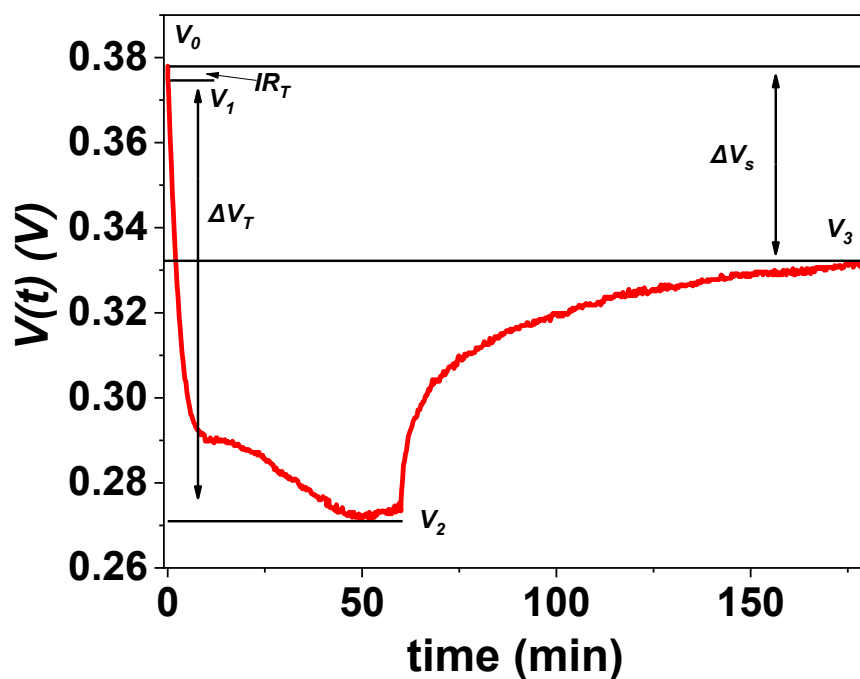

**Fig. S1** A typical magnified voltage-time profile of one discharge pulse derived from GITT.

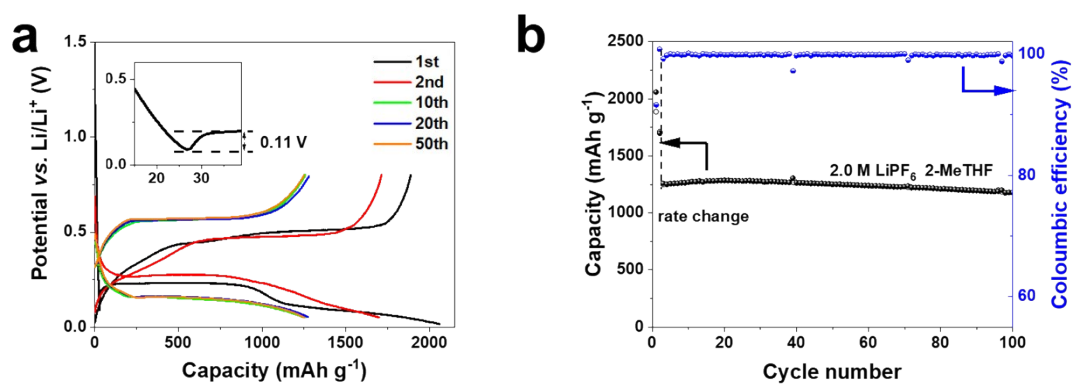

**Fig. S2 a)** Typical charge/discharge profiles and **b)** Cycling stability and CE of Al-SiMP electrode cycled in 2.0 M LiPF<sub>6</sub> 2-MeTHF. The rates were C/10 at the initial 2 cycles and 2C at the subsequent cycles.

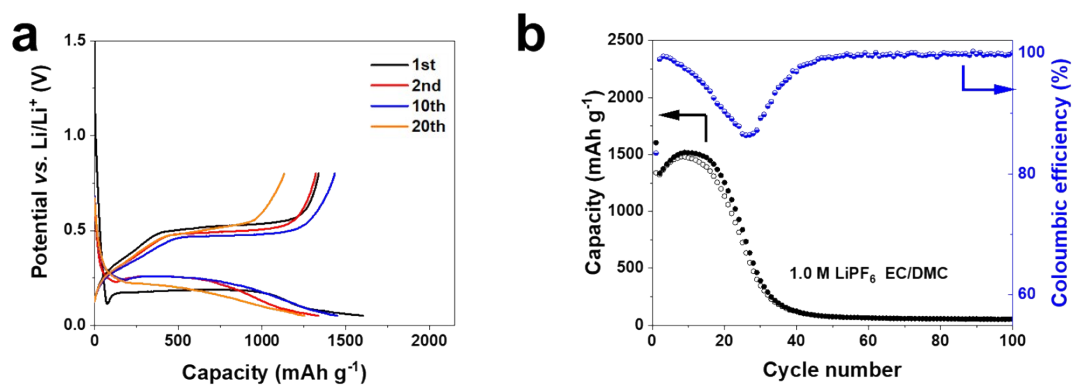

**Fig. S3 a)** Typical charge/discharge profiles and **b)** Cycling stability and CE of Al-SiMP electrode cycled in 1.0 M LiPF<sub>6</sub> EC/DMC. The rate was C/10.

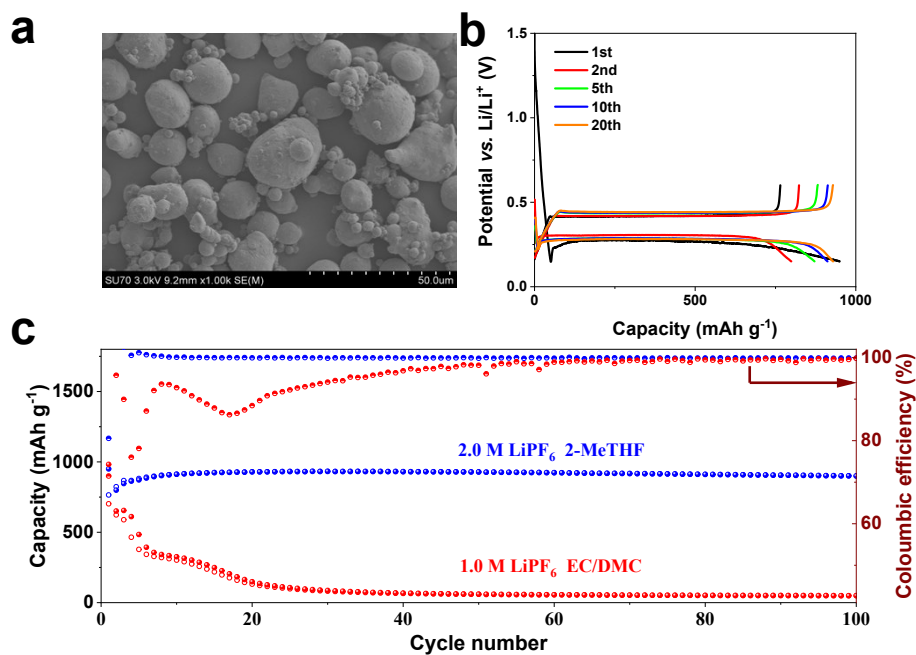

**Fig. S4 a)** SEM images of AlMPs. **b)** Voltage profiles of AlMPs cycled in 2.0 M LiPF<sub>6</sub> 2-MeTHF electrolyte. **c)** Cycling performance and CEs of AlMPs cycled in 2.0 M LiPF<sub>6</sub> 2-MeTHF electrolyte.

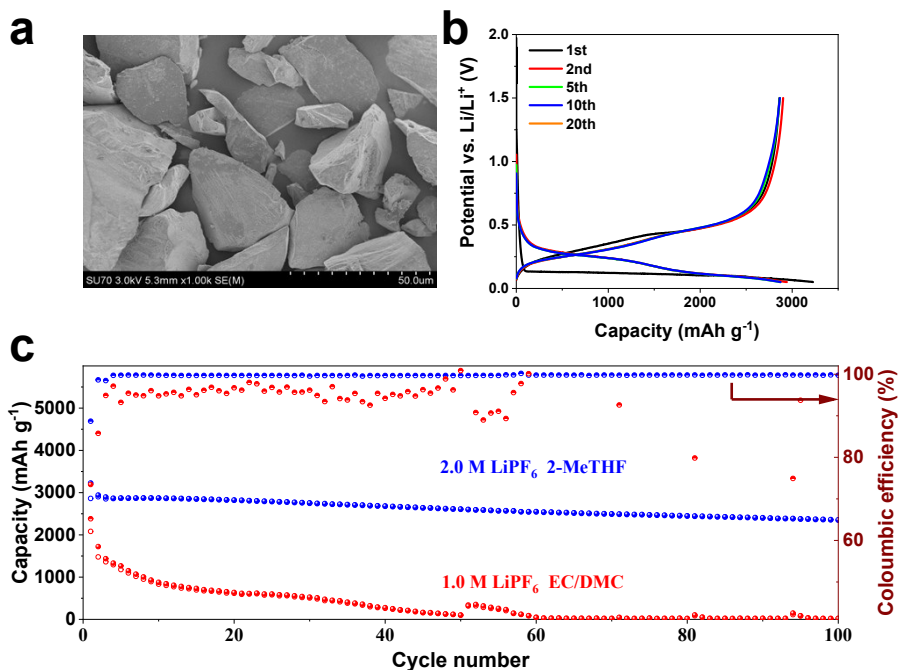

**Fig. S5** a) SEM images of SiMPs. b) Voltage profiles of SiMPs cycled in 2.0 M LiPF<sub>6</sub> 2-MeTHF electrolyte. c) Cycling performance and CEs of SiMPs cycled in 2.0 M LiPF<sub>6</sub> 2-MeTHF electrolyte.

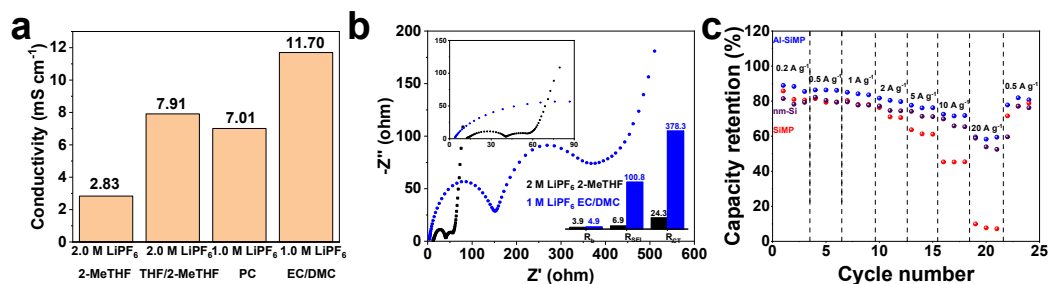

**Fig. S6** a) Ionic conductivity comparison of various electrolytes. b) EIS in Nyquist plots of Al-SiMPs in 2.0 M LiPF<sub>6</sub> 2-MeTHF electrolyte (black), 1.0 M LiPF<sub>6</sub>/EC-DMC electrolyte (blue). c) The comparison of rate performance of Al-SiMP (blue), nano-Si (purple), and SiMP (red).

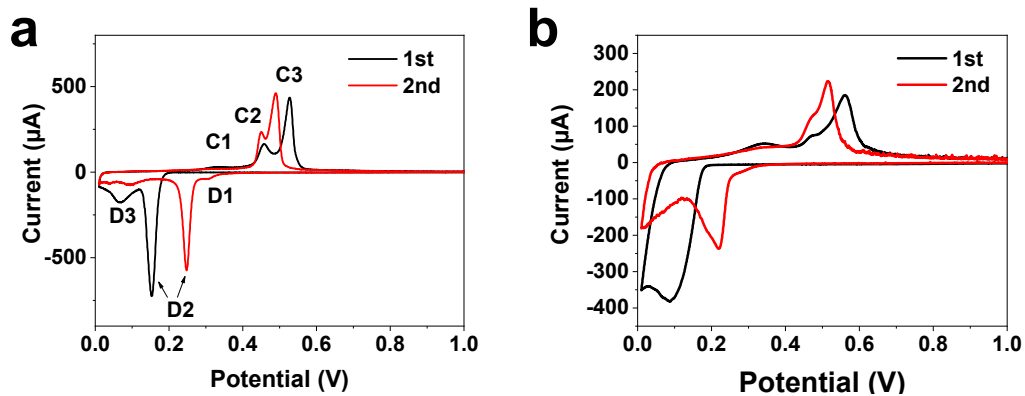

**Fig. S7** CV curves of Al-SiMPs cycled in **a)** 2.0 M  $\text{LiPF}_6$  2-MeTHF and **b)** 1.0 M  $\text{LiPF}_6/\text{EC-DMC}$  electrolyte.

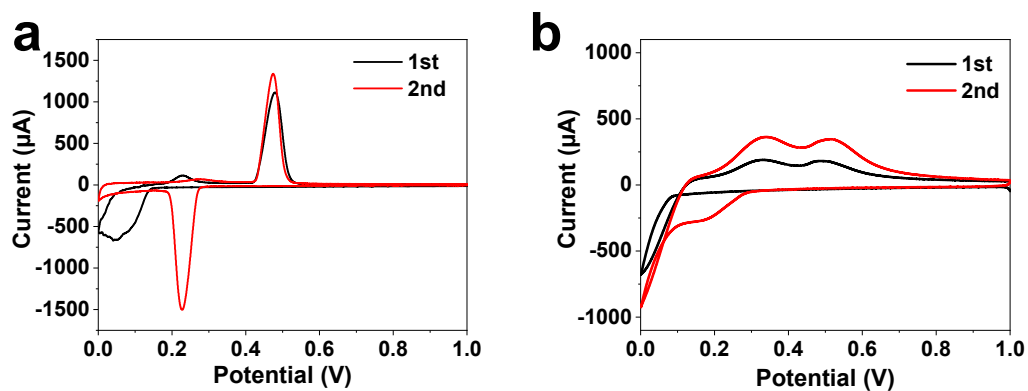

**Fig. S8** CV curves of **a)** AlMPs, **b)** SiMPs cycled in 2.0 M  $\text{LiPF}_6$  2-MeTHF.

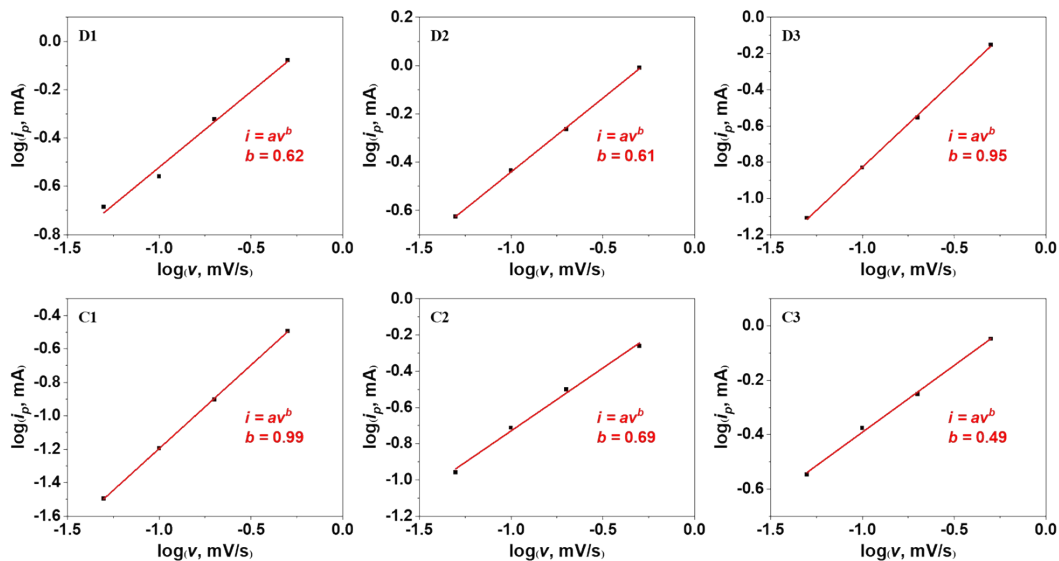

**Fig. S9** Log  $i$  (peak current) vs. log  $v$  (scan rate) plots at charging/discharging from the CV curves of Al-SiMPs.

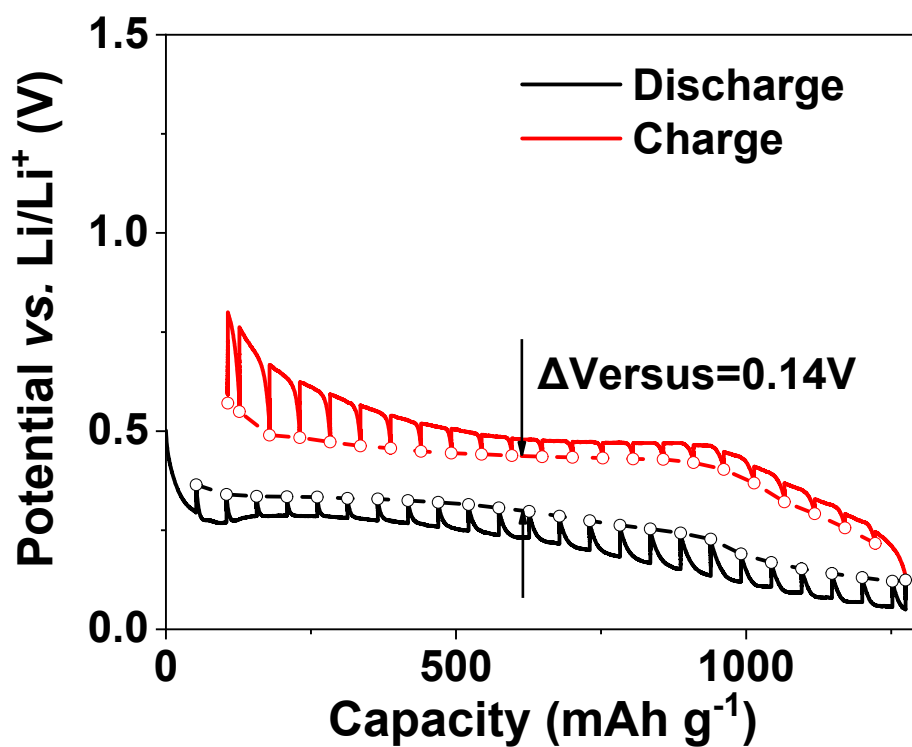

**Fig. S10** GITT profiles of Al-SiMPs in 1.0 M LiPF<sub>6</sub> EC/DMC.



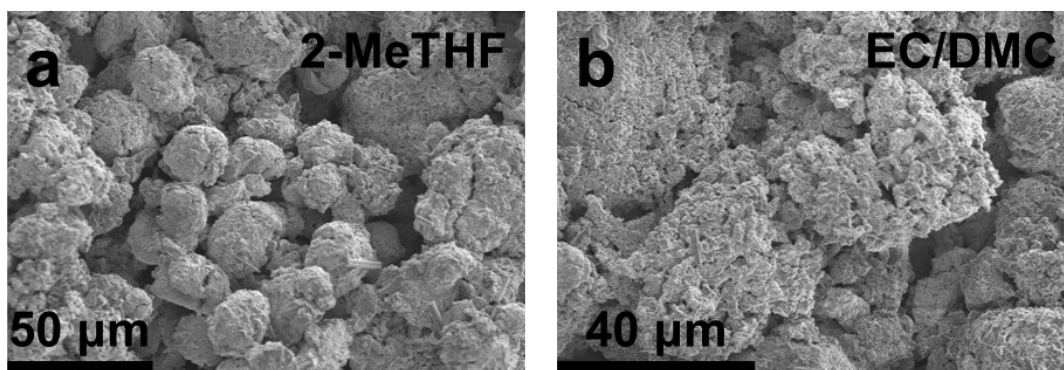

**Fig. S11** SEM images of **a)** Al-SiMPs cycled in 2.0 M LiPF<sub>6</sub> 2-MeTHF electrolyte after 5 cycles, and **b)** Al-SiMPs cycled in 1.0 M LiPF<sub>6</sub> EC/DMC electrolyte after 5 cycles.

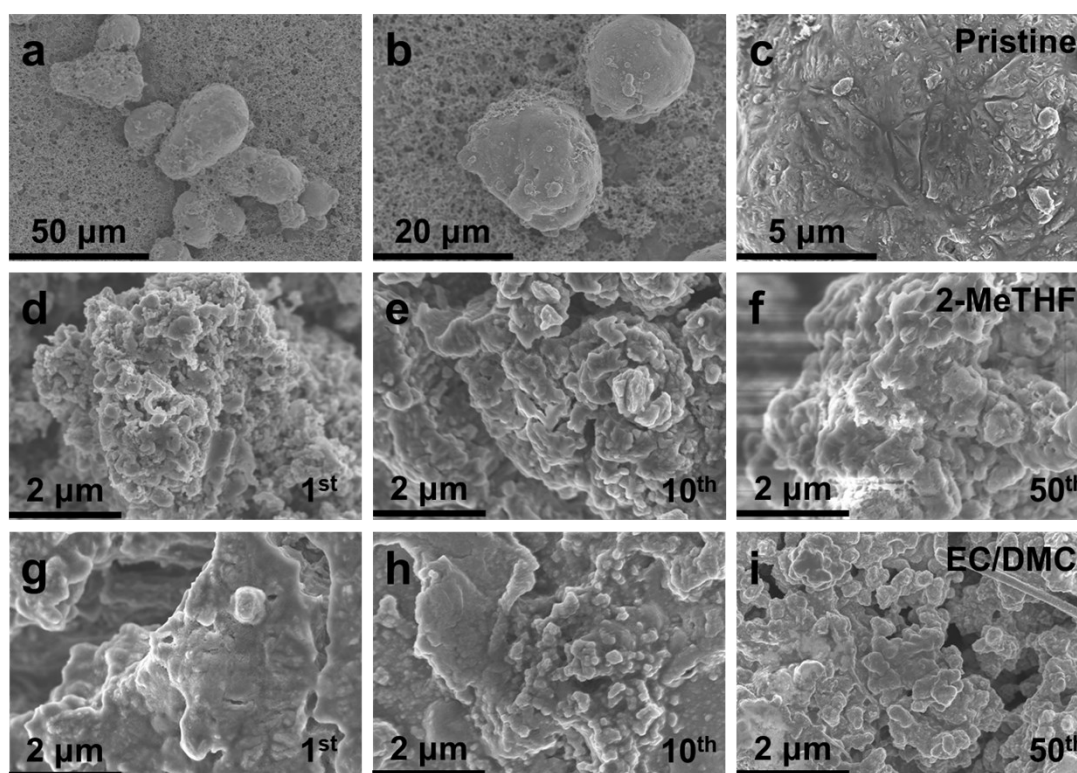

**Fig. S12** SEM images of **a), b) c)** pristine Al-SiMPs. **d), e), f)** Al-SiMPs cycled in 2.0 M LiPF<sub>6</sub> 2-MeTHF electrolyte after 1, 10, 50 cycles. **g), h), i)** Al-SiMPs cycled in 1.0 M LiPF<sub>6</sub>/EC-DMC electrolyte after 1, 10, 50 cycles.

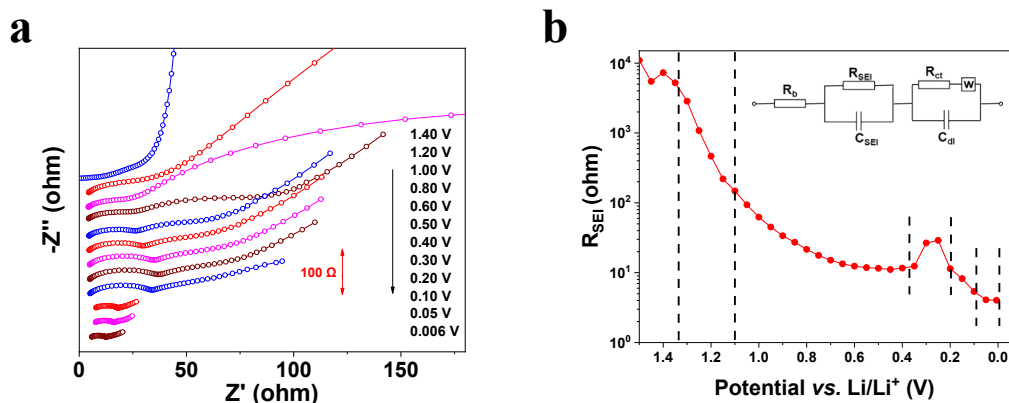

**Fig. S13 a)** EIS of Al-Si electrode in the 2-MeTHF-based electrolyte at various potentials recorded during the first lithiation process: from 1.4 V to 0.006 V. **b)** Potential dependences of  $R_{SEI}$  of the Al-Si anode in the 2-MeTHF-based electrolyte.

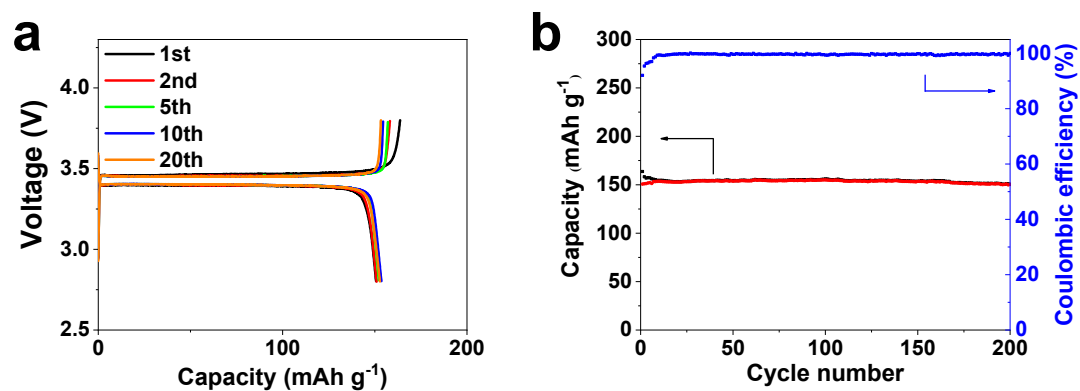

**Fig. S14 a)** Voltage profiles and **b)** cycling performance of LFP cathode cycled in 2.0 M  $\text{LiPF}_6$  2-MeTHF electrolyte.

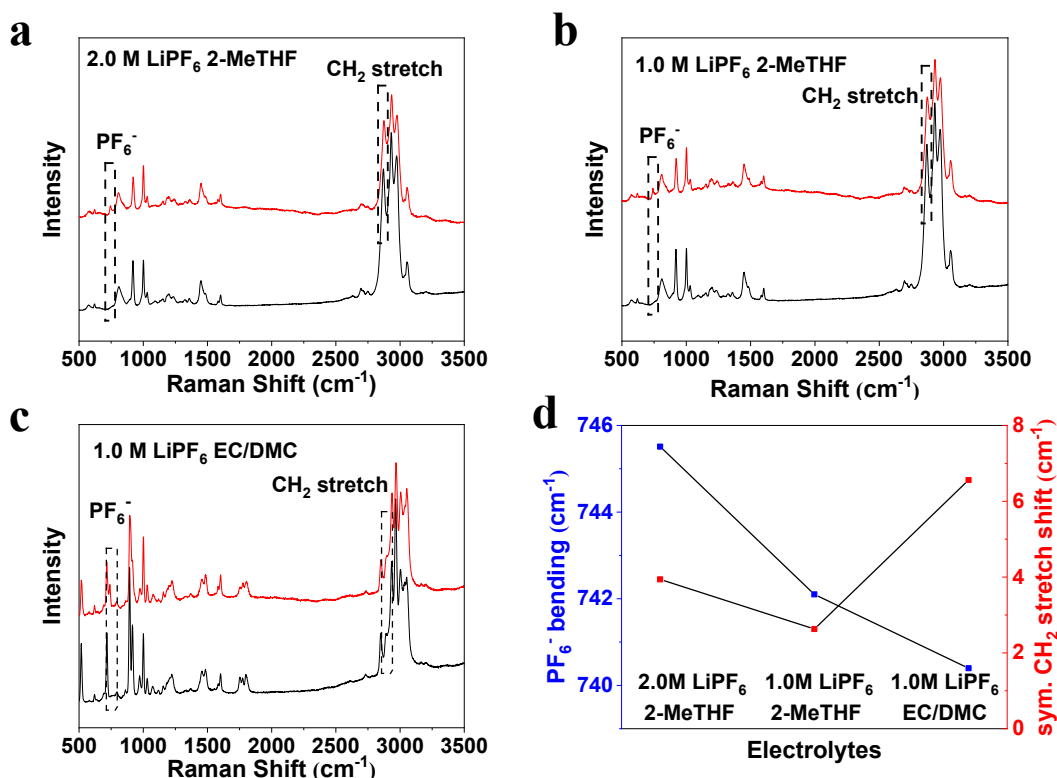

**Fig. S15** Raman spectra of various electrolytes with their pure solvent: a) 2.0 M LiPF<sub>6</sub> 2-MeTHF, b) 1.0 M LiPF<sub>6</sub> 2-MeTHF, c) 1.0 M LiPF<sub>6</sub> EC/DMC. d) The peak shift trend of PF<sub>6</sub><sup>-</sup> and CH<sub>2</sub> stretch.

### Reference

- [1] C.M. Burba, R. Frech, *J. Phys. Chem. B*, 2005, **109**, 15161-15164.
- [2] J. Ming, Z. Cao, W. Wahyudi, M.L. Li, P. Kumar, Y.Q. Wu, J.Y. Hwang, M.N. Hedhili, L. Cavallo, Y.K. Sun, L.J. Li, *Acs Energy Lett.* 2018, **3**, 335-340.
- [3] Y. Yamada, K. Furukawa, K. Sodeyama, K. Kikuchi, M. Yaegashi, Y. Tateyama, A. Yamada, *J. Am. Chem. Soc.* 2014, **136**, 5039-46.
- [4] J. Chen, X. Fan, Q. Li, H. Yang, M.R. Khoshi, Y. Xu, S. Hwang, L. Chen, X. Ji, C. Yang, H. He, C. Wang, E. Garfunkel, D. Su, O. Borodin, C. Wang, *Nat. Energy* 2020, **5**, 386-397.
